# Supplementary material for: Access to HIV care and treatment for migrants between Lesotho and South Africa: a mixed methods study
Source: BMC Public Health. 2018 May 29;18:668. doi: 10.1186/s12889-018-5594-3 (PMC5975397; doi:10.1186/s12889-018-5594-3)
Supplement: Supplementary file 1 — Survey data from 524 HIV infected migrants, Lesotho, 2016. (XLSX 44 kb) [file 12889_2018_5594_MOESM1_ESM.xlsx]

## Sheet: Sheet1
site	district	location	migrant_status	arvs_get_where	arvs_prefer_where	arvs_prefer_lesotho	arvs_prefer_sa	months_prefer	barrier_dontknowwehere	barrier_discriminated	barrier_payforservice	barrier_refusedservice	barrier_arvsregimen	barrier_confiscated	barrier_legal	barrier_transportcost	barrier_nobarrier	ever_defaulted	reason_couldnotgettolesotho	reason_didnotknowwhere	reason_payforservice	reason_refusedservice	reason_arvsregimen	reason_legal	reason_transportcost	reason_other	what_occupation	gender	age_group
Maputsoe S.D.A.	Leribe	Urban	Self-reported as migrant	Lesotho	Lesotho	1		Three to four months refills	1									Yes	1	1							Domestic worker	Female	26-35
Maputsoe S.D.A.	Leribe	Urban	Self-reported as migrant	Lesotho	Lesotho	1		One to two months refills	1	1					1	1		No									Construction worker	Male	26-35
Maputsoe S.D.A.	Leribe	Urban	Self-reported as migrant		Lesotho	1		Three to four months refills	1							1		Yes	1	1							Other occupation	Male	36-45
Maputsoe S.D.A.	Leribe	Urban	Self-reported as migrant	Lesotho	Lesotho	1			1		1				1			No									Farmer	Female	36-45
Maputsoe S.D.A.	Leribe	Urban	Self-reported as migrant	Lesotho	Lesotho	1		Three to four months refills	1						1			Yes		1							Construction worker	Male	46-55
Maputsoe S.D.A.	Leribe	Urban	Self-reported as migrant	Lesotho	Lesotho	1		Three to four months refills									1	No									Construction worker	Male	36-45
Maputsoe S.D.A.	Leribe	Urban	Self-reported as migrant	Lesotho	Lesotho	1		Three to four months refills						1				Yes	1						1		Farmer	Male
Maputsoe S.D.A.	Leribe	Urban	Self-reported as migrant	Lesotho	Lesotho	1		Three to four months refills	1									No									Domestic worker	Female	26-35
Maputsoe S.D.A.	Leribe	Urban	Self-reported as migrant	Lesotho	Lesotho	1		Three to four months refills									1	No									Construction worker	Male	36-45
Maputsoe S.D.A.	Leribe	Urban	Self-reported as migrant	Lesotho	Lesotho	1		Three to four months refills									1	No									Domestic worker	Female	26-35
Maputsoe S.D.A.	Leribe	Urban	Self-reported as migrant	Lesotho	Lesotho	1		Three to four months refills								1											Construction worker	Male	26-35
Maputsoe S.D.A.	Leribe	Urban	Self-reported as migrant	Lesotho	Lesotho	1		Three to four months refills								1		No									Farmer	Female	36-45
Maputsoe S.D.A.	Leribe	Urban	Self-reported as migrant	Lesotho	Lesotho	1		Three to four months refills								1		No									Domestic worker	Female	36-45
Maputsoe S.D.A.	Leribe	Urban	Self-reported as migrant	Lesotho	Lesotho	1		Three to four months refills									1	No									Other occupation	Male	Over 55
Maputsoe S.D.A.	Leribe	Urban	Self-reported as migrant	Lesotho	Lesotho	1		Three to four months refills									1	No									Other occupation	Female	46-55
Scott Hospital	Maseru	Rural	Self-reported as migrant	Lesotho	Lesotho	1		One to two months refills								1		No									Domestic worker	Female	36-45
Scott Hospital	Maseru	Rural	Self-reported as migrant	Lesotho	Lesotho	1		Five to six months refills								1		No									Domestic worker	Female	36-45
Scott Hospital	Maseru	Rural	Self-reported as migrant	Lesotho	Lesotho	1		Three to four months refills								1		No									Domestic worker	Female	36-45
Scott Hospital	Maseru	Rural	Self-reported as migrant	Lesotho	Lesotho	1		Three to four months refills									1	Yes								1	Domestic worker	Female	26-35
Scott Hospital	Maseru	Rural	Self-reported as migrant	Lesotho	Lesotho	1		Three to four months refills	1									Yes	1								Domestic worker	Female	36-45
Scott Hospital	Maseru	Rural	Self-reported as migrant	Lesotho	Lesotho	1		Three to four months refills										No									Domestic worker	Female	46-55
Scott Hospital	Maseru	Rural	Self-reported as migrant	Lesotho	Lesotho	1		Three to four months refills	1									No									Domestic worker	Female	18-25
Scott Hospital	Maseru	Rural	Self-reported as migrant	Lesotho	Lesotho	1		Three to four months refills									1	No									Textile industry worker	Female	26-35
Scott Hospital	Maseru	Rural	Self-reported as migrant	Lesotho	Lesotho	1		Three to four months refills	1									No									Domestic worker	Female	26-35
Scott Hospital	Maseru	Rural	Self-reported as migrant	Lesotho	Lesotho	1		Three to four months refills									1	No									Domestic worker	Female	36-45
Scott Hospital	Maseru	Rural	Self-reported as migrant	Lesotho	Lesotho	1		Three to four months refills									1	Yes	1								Domestic worker	Female	26-35
Scott Hospital	Maseru	Rural	Self-reported as migrant	Lesotho	Lesotho	1		Three to four months refills									1	No									Domestic worker	Female	36-45
Scott Hospital	Maseru	Rural	Self-reported as migrant	Lesotho	Lesotho	1		Three to four months refills									1	No									Domestic worker	Female	36-45
Scott Hospital	Maseru	Rural	Self-reported as migrant	Lesotho	Lesotho	1		Three to four months refills									1	No									Domestic worker	Female	36-45
Scott Hospital	Maseru	Rural	Self-reported as migrant	Lesotho	Lesotho	1		Three to four months refills	1									Yes	1								Domestic worker	Female	26-35
Scott Hospital	Maseru	Rural	Self-reported as migrant	Lesotho	Lesotho	1			1									No									Domestic worker	Female	36-45
Seshote H/C	Leribe	Rural	Self-reported as migrant	Lesotho	Lesotho	1		Five to six months refills		1			1					No									Domestic worker	Female	46-55
Seshote H/C	Leribe	Rural	Self-reported as migrant	Lesotho	Lesotho	1		Five to six months refills									1	No									Domestic worker	Female	26-35
Seshote H/C	Leribe	Rural	Self-reported as migrant	Lesotho	Lesotho	1		One to two months refills								1		No									Domestic worker	Female	26-35
Seshote H/C	Leribe	Rural	Self-reported as migrant	Lesotho	Lesotho	1		Five to six months refills								1		No									Domestic worker	Female	46-55
Seshote H/C	Leribe	Rural	Self-reported as migrant	Lesotho	Lesotho	1		Three to four months refills					1			1		No									Other occupation	Female	26-35
Seshote H/C	Leribe	Rural	Self-reported as migrant	Lesotho	Lesotho	1		One to two months refills									1	No										Female	26-35
Seshote H/C	Leribe	Rural	Self-reported as migrant	Lesotho				Three to four months refills									1	Yes	1								Domestic worker	Female	36-45
Seshote H/C	Leribe	Rural	Self-reported as migrant	Lesotho	South Africa		1	Five to six months refills									1	No									Construction worker	Male	36-45
Seshote H/C	Leribe	Rural	Self-reported as migrant	Lesotho	Lesotho	1		Five to six months refills								1		No									Construction worker	Male	36-45
Seshote H/C	Leribe	Rural	Self-reported as migrant	Lesotho	Lesotho	1		Three to four months refills									1	No									Other occupation	Female	26-35
Seshote H/C	Leribe	Rural	Self-reported as migrant	Lesotho	Lesotho	1		Three to four months refills									1	No									Miner	Male	36-45
St. Joseph Hospital	Maseru	Rural	Self-reported as migrant	Lesotho	Lesotho	1		Three to four months refills								1		No									Construction worker	Male	26-35
St. Joseph Hospital	Maseru	Rural	Self-reported as migrant	Lesotho	Lesotho	1		One to two months refills									1	No									Other occupation	Male	26-35
St. Joseph Hospital	Maseru	Rural	Self-reported as migrant	Lesotho	Lesotho	1		Three to four months refills		1								No									Domestic worker	Female	Over 55
St. Joseph Hospital	Maseru	Rural	Self-reported as migrant	Lesotho	Lesotho	1		Three to four months refills									1	No									Student	Female	18-25
St. Joseph Hospital	Maseru	Rural	Self-reported as migrant	Lesotho	Lesotho	1		One to two months refills	1									No									Construction worker	Male	26-35
St. Joseph Hospital	Maseru	Rural	Self-reported as migrant	Lesotho	Lesotho	1									1			No									Construction worker	Male	36-45
St. Joseph Hospital	Maseru	Rural	Self-reported as migrant	Lesotho	Lesotho	1		Three to four months refills							1			No									Construction worker	Female	36-45
St. Joseph Hospital	Maseru	Rural	Self-reported as migrant	Lesotho	Lesotho	1		Three to four months refills									1	No									Other occupation	Female	36-45
St. Joseph Hospital	Maseru	Rural	Self-reported as migrant	Lesotho	Lesotho	1		Three to four months refills		1								No									Miner	Male	26-35
St. Joseph Hospital	Maseru	Rural	Self-reported as migrant	Lesotho	Lesotho	1		Three to four months refills									1	No								1		Female	46-55
St. Joseph Hospital	Maseru	Rural	Self-reported as migrant	Lesotho	Lesotho	1		Three to four months refills								1		No									Domestic worker	Female	36-45
St. Joseph Hospital	Maseru	Rural	Self-reported as migrant	Lesotho	Lesotho	1		Five to six months refills								1		No									Construction worker	Male	36-45
St. Joseph Hospital	Maseru	Rural	Self-reported as migrant	Lesotho	Lesotho	1		Three to four months refills					1					No									Construction worker	Male	26-35
Mafeteng Hospital	Mafeteng	Urban	Self-reported as migrant	Lesotho	Lesotho	1		Five to six months refills									1	No									Construction worker	Male	46-55
Mafeteng Hospital	Mafeteng	Urban	Self-reported as migrant	Lesotho	Lesotho	1		Five to six months refills									1	Yes	1	1			1		1	1	Textile industry worker	Female	36-45
Mafeteng Hospital	Mafeteng	Urban	Self-reported as migrant	Lesotho	Lesotho	1		Five to six months refills	1	1	1				1	1		No									Domestic worker	Female	36-45
Mafeteng Hospital	Mafeteng	Urban	Self-reported as migrant	Lesotho	Lesotho	1		Five to six months refills	1							1		No									Miner	Male	46-55
Mafeteng Hospital	Mafeteng	Urban	Self-reported as migrant	Lesotho	Lesotho	1		Five to six months refills							1			No									Farmer	Female	Over 55
Mafeteng Hospital	Mafeteng	Urban	Self-reported as migrant	Lesotho	Lesotho	1		Five to six months refills									1	No									Construction worker	Male	26-35
Mafeteng Hospital	Mafeteng	Urban	Self-reported as migrant	Lesotho	Lesotho	1		Five to six months refills							1			No									Domestic worker	Female	36-45
Mafeteng Hospital	Mafeteng	Urban	Self-reported as migrant	Lesotho	Lesotho	1		Three to four months refills									1	No									Textile industry worker	Female	26-35
Mafeteng Hospital	Mafeteng	Urban	Self-reported as migrant	Lesotho	Lesotho	1		Five to six months refills							1			No										Female	26-35
Mafeteng Hospital	Mafeteng	Urban	Self-reported as migrant	Lesotho	Lesotho	1		Five to six months refills								1		No								1		Male	26-35
Mafeteng Hospital	Mafeteng	Urban	Self-reported as migrant	Lesotho	Lesotho	1		Five to six months refills							1			No									Domestic worker	Female	18-25
Mafeteng Hospital	Mafeteng	Urban	Self-reported as migrant	Lesotho	Lesotho	1		Five to six months refills									1	Yes	1								Domestic worker	Female	26-35
Mafeteng Hospital	Mafeteng	Urban	Self-reported as migrant	Lesotho	Lesotho	1		Three to four months refills							1			No		1							Domestic worker	Female	18-25
Mafeteng Hospital	Mafeteng	Urban	Self-reported as migrant	Lesotho	Lesotho	1		Three to four months refills		1		1		1	1			No								1		Female	26-35
Mafeteng Hospital	Mafeteng	Urban	Self-reported as migrant	Lesotho	Lesotho	1		Three to four months refills	1									No									Farmer	Male	36-45
Mafeteng Hospital	Mafeteng	Urban	Self-reported as migrant	Lesotho	Lesotho	1		Five to six months refills										No									Domestic worker	Female
Mafeteng Hospital	Mafeteng	Urban	Self-reported as migrant	Lesotho	Lesotho	1		One to two months refills		1								Yes							1		Domestic worker	Female	36-45
Mafeteng Hospital	Mafeteng	Urban	Self-reported as migrant	Lesotho	Lesotho	1		Five to six months refills							1			Yes	1								Construction worker	Male	26-35
Mafeteng Hospital	Mafeteng	Urban	Self-reported as migrant	Lesotho	Lesotho	1		Five to six months refills								1		Yes	1								Domestic worker	Female	46-55
Mafeteng Hospital	Mafeteng	Urban	Self-reported as migrant	Lesotho	Lesotho	1		Five to six months refills		1					1	1		No									Construction worker	Male	36-45
Mafeteng Hospital	Mafeteng	Urban	Self-reported as migrant	Lesotho	Lesotho	1		Five to six months refills							1			No									Construction worker	Male	18-25
Mafeteng Hospital	Mafeteng	Urban	Self-reported as migrant	Lesotho	Lesotho	1		Three to four months refills	1									Yes	1			1			1		Construction worker	Male
Mafeteng Hospital	Mafeteng	Urban	Self-reported as migrant	Lesotho	Lesotho	1		Five to six months refills		1								No									Domestic worker	Female	26-35
Mafeteng Hospital	Mafeteng	Urban	Self-reported as migrant	Lesotho				Five to six months refills	1	1		1		1		1		No
Mafeteng Hospital	Mafeteng	Urban	Self-reported as migrant	Lesotho	Lesotho	1		One to two months refills									1
Mafeteng Hospital	Mafeteng	Urban	Self-reported as migrant	Lesotho	Lesotho	1		Five to six months refills	1									Yes					1				Textile industry worker	Male	46-55
Mafeteng Hospital	Mafeteng	Urban	Self-reported as migrant	Lesotho	Lesotho	1		Five to six months refills								1		Yes	1								Domestic worker	Female	26-35
Mafeteng Hospital	Mafeteng	Urban	Self-reported as migrant	Lesotho	Lesotho	1		Five to six months refills					1					No									Domestic worker	Female	46-55
Mafeteng Hospital	Mafeteng	Urban	Self-reported as migrant	Lesotho	Lesotho	1		Three to four months refills										Yes	1				1				Domestic worker	Female	26-35
Mafeteng Hospital	Mafeteng	Urban	Self-reported as migrant	Lesotho	Lesotho	1		Five to six months refills						1				No								1		Female	46-55
Mafeteng Hospital	Mafeteng	Urban	Self-reported as migrant	Lesotho	Lesotho	1		Five to six months refills								1		No										Female	26-35
Mafeteng Hospital	Mafeteng	Urban	Self-reported as migrant	Lesotho	Lesotho	1		Five to six months refills									1	No									Domestic worker		36-45
Mafeteng Hospital	Mafeteng	Urban	Self-reported as migrant	Lesotho	Lesotho	1		Five to six months refills	1						1			Yes								1	Textile industry worker	Female	36-45
Mafeteng Hospital	Mafeteng	Urban	Self-reported as migrant	Lesotho	Lesotho	1		Five to six months refills	1		1		1		1	1		Yes	1	1	1		1	1	1		Domestic worker	Female	36-45
Mafeteng Hospital	Mafeteng	Urban	Self-reported as migrant	Lesotho	Lesotho	1		Five to six months refills										Yes	1								Domestic worker	Female	36-45
Mafeteng Hospital	Mafeteng	Urban	Self-reported as migrant	Lesotho	Lesotho	1		Five to six months refills									1	No									Construction worker	Male	36-45
Mafeteng Hospital	Mafeteng	Urban	Self-reported as migrant	Lesotho	Lesotho	1		Five to six months refills			1							No									Domestic worker	Female	26-35
Mafeteng Hospital	Mafeteng	Urban	Self-reported as migrant	Lesotho	Lesotho	1		Five to six months refills								1		Yes	1								Domestic worker	Female	46-55
Mafeteng Hospital	Mafeteng	Urban	Self-reported as migrant	Lesotho	Lesotho	1		Five to six months refills	1	1			1		1	1		No
Mafeteng Hospital	Mafeteng	Urban	Self-reported as migrant	Lesotho	Lesotho	1		Three to four months refills				1		1		1		No									Domestic worker	Female	26-35
Mafeteng Hospital	Mafeteng	Urban	Self-reported as migrant	Lesotho	Lesotho	1		Three to four months refills								1		No									Domestic worker	Female	26-35
Mafeteng Hospital	Mafeteng	Urban	Self-reported as migrant	Lesotho	Lesotho	1		Five to six months refills									1	No										Female	46-55
Mafeteng Hospital	Mafeteng	Urban	Self-reported as migrant	Lesotho	Lesotho	1		Five to six months refills						1		1		Yes					1	1	1		Miner	Male
Mafeteng Hospital	Mafeteng	Urban	Self-reported as migrant	Lesotho	Lesotho	1		Five to six months refills	1	1								No					1				Textile industry worker	Male	36-45
Mafeteng Hospital	Mafeteng	Urban	Self-reported as migrant	Lesotho	Lesotho	1		Five to six months refills		1						1		Yes	1	1	1	1					Farmer	Male	36-45
Mafeteng Hospital	Mafeteng	Urban	Self-reported as migrant	Lesotho	Lesotho	1		Five to six months refills								1		Yes	1				1	1	1		Domestic worker	Male	46-55
Mafeteng Hospital	Mafeteng	Urban	Self-reported as migrant	Lesotho	Lesotho	1		Five to six months refills								1		Yes							1		Domestic worker	Female	46-55
Mafeteng Hospital	Mafeteng	Urban	Self-reported as migrant	Lesotho	Lesotho	1		Five to six months refills								1		Yes							1		Textile industry worker	Male	36-45
Mafeteng Hospital	Mafeteng	Urban	Self-reported as migrant	Lesotho	Lesotho	1		Five to six months refills								1		Yes							1		Domestic worker	Female	36-45
Mafeteng Hospital	Mafeteng	Urban	Self-reported as migrant	Lesotho				Five to six months refills								1		Yes							1		Domestic worker	Male	26-35
Mafeteng Hospital	Mafeteng	Urban	Self-reported as migrant	Lesotho				Five to six months refills								1		Yes							1		Construction worker	Male	26-35
Mafeteng Hospital	Mafeteng	Urban	Self-reported as migrant	Lesotho				Three to four months refills								1		Yes							1		Farmer	Female	26-35
Mafeteng Hospital	Mafeteng	Urban	Self-reported as migrant	Lesotho	Lesotho	1		Five to six months refills								1		No									Domestic worker	Female	36-45
Mafeteng Hospital	Mafeteng	Urban	Self-reported as migrant	Lesotho	Lesotho	1		Three to four months refills									1	No									Construction worker	Male	36-45
Mafeteng Hospital	Mafeteng	Urban	Self-reported as migrant	Lesotho	Lesotho	1		Five to six months refills									1	No									Domestic worker	Female	36-45
Mafeteng Hospital	Mafeteng	Urban	Self-reported as migrant	Lesotho	Lesotho	1		Five to six months refills									1	No									Other occupation		46-55
Mafeteng Hospital	Mafeteng	Urban	Self-reported as migrant	Lesotho	Lesotho	1		Five to six months refills		1				1	1			No									Construction worker	Male	36-45
Mafeteng Hospital	Mafeteng	Urban	Self-reported as migrant	Lesotho				One to two months refills									1	No
Mafeteng Hospital	Mafeteng	Urban	Self-reported as migrant		Lesotho	1		Three to four months refills									1	No									Domestic worker	Female	36-45
Mafeteng Hospital	Mafeteng	Urban	Self-reported as migrant	Lesotho	Lesotho	1		Three to four months refills		1								No									Other occupation	Male	36-45
Mafeteng Hospital	Mafeteng	Urban	Self-reported as migrant	Lesotho	Lesotho	1		Three to four months refills									1	No									Domestic worker	Male	26-35
Mafeteng Hospital	Mafeteng	Urban	Self-reported as migrant	Lesotho	Lesotho	1		One to two months refills								1		Yes	1								Other occupation	Female	46-55
Mafeteng Hospital	Mafeteng	Urban	Self-reported as migrant	Lesotho	Lesotho	1		Five to six months refills								1		Yes		1							Other occupation	Male	36-45
Mafeteng Hospital	Mafeteng	Urban	Self-reported as migrant	Lesotho	Lesotho	1		Five to six months refills	1		1		1			1		Yes	1		1		1			1	Domestic worker	Female	26-35
Mafeteng Hospital	Mafeteng	Urban	Self-reported as migrant	Lesotho	Lesotho	1		Five to six months refills	1		1		1		1	1		Yes	1		1				1		Construction worker	Male	36-45
Mafeteng Hospital	Mafeteng	Urban	Self-reported as migrant	Lesotho	Lesotho	1		One to two months refills									1	No										Male	Over 55
Mafeteng Hospital	Mafeteng	Urban	Self-reported as migrant	Lesotho	Lesotho	1		Five to six months refills								1		No									Construction worker	Male	46-55
Mafeteng Hospital	Mafeteng	Urban	Self-reported as migrant	Lesotho	Lesotho	1		Three to four months refills									1	No										Female	Over 55
Mafeteng Hospital	Mafeteng	Urban	Self-reported as migrant	Lesotho	Lesotho	1		Five to six months refills	1									No									Construction worker	Male	46-55
Mafeteng Hospital	Mafeteng	Urban	Self-reported as migrant	Lesotho	Lesotho	1		Five to six months refills					1					Yes	1								Domestic worker	Female	36-45
Mafeteng Hospital	Mafeteng	Urban	Self-reported as migrant	Lesotho	Lesotho	1		Five to six months refills									1	No										Female	46-55
Mafeteng Hospital	Mafeteng	Urban	Self-reported as migrant	Lesotho	Lesotho	1		Five to six months refills								1		No									Domestic worker	Female	26-35
Mafeteng Hospital	Mafeteng	Urban	Self-reported as migrant	Lesotho	Lesotho	1		Three to four months refills								1		No									Domestic worker	Female	18-25
Mafeteng Hospital	Mafeteng	Urban	Self-reported as migrant	Lesotho	Lesotho	1		Five to six months refills				1		1	1	1		No									Farmer	Male	Over 55
Mafeteng Hospital	Mafeteng	Urban	Self-reported as migrant	Lesotho	Lesotho	1		Three to four months refills									1	No									Construction worker	Male	36-45
Mafeteng Hospital	Mafeteng	Urban	Self-reported as migrant	Lesotho	Lesotho	1		Five to six months refills	1					1	1	1		Yes						1			Other occupation	Male	36-45
Mafeteng Hospital	Mafeteng	Urban	Self-reported as migrant	Lesotho	Lesotho	1		Five to six months refills			1							No									Construction worker	Male	36-45
Mafeteng Hospital	Mafeteng	Urban	Self-reported as migrant	Lesotho	Lesotho	1		Five to six months refills								1		Yes							1		Construction worker	Male	36-45
Mafeteng Hospital	Mafeteng	Urban	Self-reported as migrant	Lesotho	Lesotho	1			1	1	1					1		No									Domestic worker	Female	26-35
Mafeteng Hospital	Mafeteng	Urban	Self-reported as migrant	Lesotho	Lesotho	1		Five to six months refills				1						Yes							1		Miner	Male	Over 55
Mafeteng Hospital	Mafeteng	Urban	Self-reported as migrant	Lesotho	Lesotho	1		Five to six months refills								1		Yes	1							1	Construction worker	Male	26-35
Mafeteng Hospital	Mafeteng	Urban	Self-reported as migrant	Lesotho	Lesotho	1		Five to six months refills	1	1		1		1	1	1		Yes	1	1	1			1	1		Domestic worker	Female	36-45
Mafeteng Hospital	Mafeteng	Urban	Self-reported as migrant	Lesotho	Lesotho	1		Five to six months refills	1	1		1			1	1		Yes	1	1				1	1		Domestic worker	Female	26-35
Mafeteng Hospital	Mafeteng	Urban	Self-reported as migrant	Lesotho	Lesotho	1		Five to six months refills	1	1		1			1	1		Yes	1	1				1			Domestic worker	Female	26-35
Mafeteng Hospital	Mafeteng	Urban	Self-reported as migrant	Lesotho	Lesotho	1		Five to six months refills	1	1		1			1	1		Yes	1	1				1			Domestic worker	Female	36-45
Mafeteng Hospital	Mafeteng	Urban	Self-reported as migrant	Lesotho	Lesotho	1		Three to four months refills		1								Yes		1			1	1			Construction worker	Female	36-45
Mafeteng Hospital	Mafeteng	Urban	Self-reported as migrant	Lesotho	Lesotho	1		Three to four months refills			1	1		1		1		Yes	1			1			1	1	Domestic worker	Female	36-45
Mafeteng Hospital	Mafeteng	Urban	Self-reported as migrant	Lesotho	Lesotho	1		Five to six months refills	1	1	1	1			1			Yes	1	1					1		Construction worker	Male	36-45
Mafeteng Hospital	Mafeteng	Urban	Self-reported as migrant	Lesotho	Lesotho	1		Five to six months refills	1		1	1		1		1		Yes	1	1	1		1	1			Miner	Male	46-55
Mafeteng Hospital	Mafeteng	Urban	Self-reported as migrant	Lesotho	Lesotho	1		Five to six months refills			1		1	1		1		Yes	1		1		1		1		Domestic worker	Female	36-45
Domiciliary H/C	Maseru	Urban	Self-reported as migrant	Lesotho	Lesotho	1		Three to four months refills								1		No									Domestic worker	Female	26-35
Domiciliary H/C	Maseru	Urban	Self-reported as migrant	Lesotho	Lesotho	1		Five to six months refills								1		No									Construction worker	Male	36-45
Domiciliary H/C	Maseru	Urban	Self-reported as migrant	Lesotho	Lesotho	1		Three to four months refills								1		No									Domestic worker	Female	26-35
Domiciliary H/C	Maseru	Urban	Self-reported as migrant	Lesotho	Lesotho	1		Three to four months refills								1		No									Domestic worker	Female	26-35
Domiciliary H/C	Maseru	Urban	Self-reported as migrant	Lesotho	Lesotho	1		Five to six months refills							1			No									Textile industry worker		36-45
Domiciliary H/C	Maseru	Urban	Self-reported as migrant	Lesotho	Lesotho	1		Five to six months refills									1	No									Construction worker	Male	26-35
Domiciliary H/C	Maseru	Urban	Self-reported as migrant	Lesotho	Lesotho	1		Five to six months refills									1	No									Domestic worker	Female	36-45
Domiciliary H/C	Maseru	Urban	Self-reported as migrant	Lesotho	Lesotho	1		Five to six months refills									1	Yes	1						1	1	Domestic worker	Female	46-55
Domiciliary H/C	Maseru	Urban	Self-reported as migrant	Lesotho	Lesotho	1		Five to six months refills								1		No									Construction worker	Female	26-35
Domiciliary H/C	Maseru	Urban	Self-reported as migrant	Lesotho	Lesotho	1		Five to six months refills								1		No									Domestic worker	Female	36-45
Domiciliary H/C	Maseru	Urban	Self-reported as migrant	Lesotho	Lesotho	1		Five to six months refills									1	No									Domestic worker	Female	26-35
Domiciliary H/C	Maseru	Urban	Self-reported as migrant	Lesotho	Lesotho	1		Three to four months refills								1		No									Domestic worker	Female	26-35
Domiciliary H/C	Maseru	Urban	Self-reported as migrant	Lesotho	Lesotho	1		Three to four months refills								1		No									Miner	Male	26-35
Domiciliary H/C	Maseru	Urban	Self-reported as migrant	Lesotho	Lesotho	1		Five to six months refills								1		No									Construction worker	Male	36-45
Domiciliary H/C	Maseru	Urban	Self-reported as migrant	Lesotho	Lesotho	1		Three to four months refills									1	No									Domestic worker	Female	36-45
Domiciliary H/C	Maseru	Urban	Self-reported as migrant	Lesotho	Lesotho	1		Three to four months refills				1						No									Construction worker	Male	26-35
Domiciliary H/C	Maseru	Urban	Self-reported as migrant	Lesotho	Lesotho	1		Three to four months refills									1	No									Domestic worker	Female	36-45
Domiciliary H/C	Maseru	Urban	Self-reported as migrant	Lesotho	Lesotho	1		Three to four months refills									1	No									Construction worker	Female	26-35
Domiciliary H/C	Maseru	Urban	Self-reported as migrant	Lesotho	Lesotho	1		Three to four months refills								1		No									Domestic worker	Female	18-25
Domiciliary H/C	Maseru	Urban	Self-reported as migrant	Lesotho	Lesotho	1		Five to six months refills								1		No									Construction worker	Male	26-35
Domiciliary H/C	Maseru	Urban	Self-reported as migrant	Lesotho	Lesotho	1		Five to six months refills									1	No									Miner	Female	46-55
Domiciliary H/C	Maseru	Urban	Self-reported as migrant	Lesotho	Lesotho	1		Three to four months refills									1	No									Construction worker	Male	46-55
Domiciliary H/C	Maseru	Urban	Self-reported as migrant	Lesotho	Lesotho	1		Three to four months refills									1	No									Textile industry worker	Female	26-35
Domiciliary H/C	Maseru	Urban	Self-reported as migrant	Lesotho	Lesotho	1		Three to four months refills								1		No									Domestic worker	Female	26-35
Domiciliary H/C	Maseru	Urban	Self-reported as migrant	Lesotho	Lesotho	1		Three to four months refills									1	No									Construction worker	Male	36-45
Domiciliary H/C	Maseru	Urban	Self-reported as migrant	Lesotho	Lesotho	1		Three to four months refills									1	No									Construction worker	Male	46-55
Domiciliary H/C	Maseru	Urban	Self-reported as migrant	Lesotho	Lesotho	1		Three to four months refills									1	No									Other occupation	Female	26-35
Domiciliary H/C	Maseru	Urban	Self-reported as migrant	Lesotho	Lesotho	1		Five to six months refills				1						No									Construction worker	Female	26-35
LDF H/C	Maseru	Urban	Self-reported as migrant	Lesotho	Lesotho	1		Five to six months refills					1		1			Yes								1	Domestic worker	Female	46-55
LDF H/C	Maseru	Urban	Self-reported as migrant	Lesotho	Lesotho	1		One to two months refills	1					1				No								1		Female	Over 55
LDF H/C	Maseru	Urban	Self-reported as migrant	Lesotho	Lesotho	1		Five to six months refills		1			1			1		No									Other occupation	Male	26-35
LDF H/C	Maseru	Urban	Self-reported as migrant	Lesotho	Lesotho	1		Five to six months refills				1						Yes				1					Domestic worker	Female	26-35
LDF H/C	Maseru	Urban	Self-reported as migrant	Lesotho	South Africa		1	Five to six months refills									1	No									Textile industry worker	Female	36-45
LDF H/C	Maseru	Urban	Self-reported as migrant	Lesotho	South Africa		1	Five to six months refills	1	1		1			1			No									Textile industry worker	Female	36-45
LDF H/C	Maseru	Urban	Self-reported as migrant	Lesotho	Lesotho	1		Five to six months refills				1			1	1		No								1		Female	26-35
LDF H/C	Maseru	Urban	Self-reported as migrant	Lesotho	Lesotho	1		Five to six months refills							1	1		No									Domestic worker	Female	46-55
LDF H/C	Maseru	Urban	Self-reported as migrant	Lesotho	Lesotho	1		Five to six months refills								1		No									Domestic worker	Female	26-35
LDF H/C	Maseru	Urban	Self-reported as migrant	Lesotho	Lesotho	1		Five to six months refills							1	1		No									Textile industry worker	Female	36-45
LDF H/C	Maseru	Urban	Self-reported as migrant	Lesotho	Lesotho	1		Five to six months refills							1	1		No									Domestic worker	Female	26-35
LDF H/C	Maseru	Urban	Self-reported as migrant	Lesotho	Lesotho	1		Five to six months refills									1	No										Male	36-45
LDF H/C	Maseru	Urban	Self-reported as migrant	Lesotho	Lesotho	1		Five to six months refills									1	No										Female	46-55
LDF H/C	Maseru	Urban	Self-reported as migrant	Lesotho	Lesotho	1		Five to six months refills									1	No										Female	18-25
LDF H/C	Maseru	Urban	Self-reported as migrant	Lesotho	South Africa		1	Five to six months refills	1							1		No									Farmer	Male	18-25
LDF H/C	Maseru	Urban	Self-reported as migrant	Lesotho	Lesotho	1		Five to six months refills									1	No									Textile industry worker	Female	26-35
LDF H/C	Maseru	Urban	Self-reported as migrant	Lesotho	Lesotho	1		Five to six months refills									1	No									Other occupation	Male	36-45
LDF H/C	Maseru	Urban	Self-reported as migrant	Lesotho	Lesotho	1		One to two months refills									1	No									Domestic worker	Male
LDF H/C	Maseru	Urban	Self-reported as migrant	Lesotho	Lesotho	1		Five to six months refills		1						1		No								1		Male	46-55
LDF H/C	Maseru	Urban	Self-reported as migrant	Lesotho	Lesotho	1		Five to six months refills								1		No
LDF H/C	Maseru	Urban	Self-reported as migrant	Lesotho	Lesotho	1		Five to six months refills		1		1						No									Construction worker	Male	26-35
LDF H/C	Maseru	Urban	Self-reported as migrant	Lesotho	Lesotho	1		Five to six months refills	1						1	1		No									Domestic worker	Female	46-55
LDF H/C	Maseru	Urban	Self-reported as migrant	Lesotho	Lesotho	1		Five to six months refills		1								No									Domestic worker	Female	36-45
LDF H/C	Maseru	Urban	Self-reported as migrant	Lesotho	Lesotho	1		Five to six months refills	1	1	1	1		1		1		No									Domestic worker	Female	Over 55
LDF H/C	Maseru	Urban	Self-reported as migrant	Lesotho	Lesotho	1		Five to six months refills	1									No									Domestic worker	Female	36-45
LDF H/C	Maseru	Urban	Self-reported as migrant	Lesotho	Lesotho	1		Three to four months refills	1	1					1	1		Yes	1	1				1			Textile industry worker	Female	26-35
LDF H/C	Maseru	Urban	Self-reported as migrant	Lesotho	South Africa		1	Three to four months refills		1						1		Yes	1								Textile industry worker	Female	26-35
LDF H/C	Maseru	Urban	Self-reported as migrant	Lesotho	Lesotho	1		Five to six months refills										Yes	1					1			Textile industry worker	Female	26-35
LDF H/C	Maseru	Urban	Self-reported as migrant	Lesotho	Lesotho	1		Five to six months refills	1						1			No									Construction worker	Female	36-45
LDF H/C	Maseru	Urban	Self-reported as migrant	Lesotho	Lesotho	1		Five to six months refills	1		1			1	1			No									Other occupation	Female	36-45
LDF H/C	Maseru	Urban	Self-reported as migrant	Lesotho	Lesotho	1		Three to four months refills	1							1		No									Other occupation	Male	36-45
LDF H/C	Maseru	Urban	Self-reported as migrant	Lesotho	South Africa		1	Five to six months refills	1					1		1		No									Textile industry worker	Female	26-35
LDF H/C	Maseru	Urban	Self-reported as migrant	Lesotho	Lesotho	1		Five to six months refills		1			1		1	1		No									Construction worker	Male	36-45
LDF H/C	Maseru	Urban	Self-reported as migrant	Lesotho	Lesotho	1		Five to six months refills									1	No									Domestic worker	Female	26-35
Maputsoe F/C	Leribe	Urban	Self-reported as migrant	Lesotho	Lesotho	1		Five to six months refills	1									No									Domestic worker	Female	36-45
Maputsoe F/C	Leribe	Urban	Self-reported as migrant	Lesotho	Lesotho	1				1								No									Domestic worker	Female	36-45
Maputsoe F/C	Leribe	Urban	Self-reported as migrant	Lesotho	Lesotho	1										1		No									Textile industry worker	Female	36-45
Maputsoe F/C	Leribe	Urban	Self-reported as migrant	Lesotho	Lesotho	1											1	No									Other occupation	Male	36-45
Maputsoe F/C	Leribe	Urban	Self-reported as migrant	Lesotho	Lesotho	1		Five to six months refills									1	No									Construction worker	Male	18-25
Maputsoe F/C	Leribe	Urban	Self-reported as migrant	Lesotho	Lesotho	1		Five to six months refills							1			Yes						1			Domestic worker	Female	26-35
Maputsoe F/C	Leribe	Urban	Self-reported as migrant	Lesotho	Lesotho	1											1	No								1		Male	26-35
Maputsoe F/C	Leribe	Urban	Self-reported as migrant	Lesotho	Lesotho	1											1	No									Other occupation	Female	36-45
Maputsoe F/C	Leribe	Urban	Self-reported as migrant	Lesotho				Five to six months refills							1			No									Other occupation	Female	36-45
Maputsoe F/C	Leribe	Urban	Self-reported as migrant	Lesotho	Lesotho	1		Five to six months refills							1			Yes						1			Domestic worker	Female	36-45
Maputsoe F/C	Leribe	Urban	Self-reported as migrant	Lesotho	Lesotho	1		Five to six months refills									1	No									Textile industry worker	Male	36-45
Maputsoe F/C	Leribe	Urban	Self-reported as migrant	Lesotho	Lesotho	1		Five to six months refills	1									Yes	1	1	1				1		Construction worker	Male	26-35
Maputsoe F/C	Leribe	Urban	Self-reported as migrant	Lesotho	Lesotho	1		Five to six months refills			1	1			1	1		Yes	1								Domestic worker	Female	46-55
Maputsoe F/C	Leribe	Urban	Self-reported as migrant	Lesotho	South Africa		1	Five to six months refills									1	No									Domestic worker	Female	36-45
Maputsoe F/C	Leribe	Urban	Self-reported as migrant	Lesotho	Lesotho	1		Five to six months refills	1									No									Domestic worker	Female	36-45
Maputsoe F/C	Leribe	Urban	Self-reported as migrant	Lesotho	Lesotho	1		Five to six months refills									1	No									Domestic worker	Female	18-25
Maputsoe F/C	Leribe	Urban	Self-reported as migrant	Lesotho	Lesotho	1		Three to four months refills									1	No									Construction worker	Male	36-45
Maputsoe F/C	Leribe	Urban	Self-reported as migrant	Lesotho	Lesotho	1		Three to four months refills									1	No									Domestic worker	Female	46-55
Maputsoe F/C	Leribe	Urban	Self-reported as migrant	Lesotho	Lesotho	1		Three to four months refills									1	No									Domestic worker	Female	46-55
Maputsoe F/C	Leribe	Urban	Self-reported as migrant	Lesotho	Lesotho	1		Five to six months refills	1	1								No									Textile industry worker	Female	36-45
Maputsoe F/C	Leribe	Urban	Self-reported as migrant	Lesotho	Lesotho	1		Five to six months refills	1									No									Textile industry worker	Female	36-45
Maputsoe F/C	Leribe	Urban	Self-reported as migrant	Lesotho	Lesotho	1		Five to six months refills									1	No									Construction worker	Male	18-25
Maputsoe F/C	Leribe	Urban	Self-reported as migrant	Lesotho	Lesotho	1		Five to six months refills	1	1	1	1	1					Yes		1	1	1					Healthcare professional	Male	36-45
Maputsoe F/C	Leribe	Urban	Self-reported as migrant	Lesotho	Lesotho	1		Five to six months refills							1			Yes						1			Domestic worker	Female	26-35
Maputsoe F/C	Leribe	Urban	Self-reported as migrant	Lesotho	Lesotho	1		Five to six months refills							1			No									Textile industry worker	Female	36-45
Maputsoe F/C	Leribe	Urban	Self-reported as migrant	Lesotho	Lesotho	1		Three to four months refills									1	No										Male
Maputsoe F/C	Leribe	Urban	Self-reported as migrant	Lesotho	Lesotho	1		Five to six months refills	1									No									Domestic worker	Female	36-45
Maputsoe F/C	Leribe	Urban	Self-reported as migrant	Lesotho	Lesotho	1		Five to six months refills								1		No									Textile industry worker	Female	36-45
Maputsoe F/C	Leribe	Urban	Self-reported as migrant	Lesotho	Lesotho	1		Five to six months refills									1	No								1		Male	26-35
Maputsoe F/C	Leribe	Urban	Self-reported as migrant	Lesotho	Lesotho	1		Five to six months refills							1			Yes						1			Domestic worker	Female	26-35
Maputsoe F/C	Leribe	Urban	Self-reported as migrant	Lesotho	Lesotho	1		Five to six months refills									1	Yes	1	1	1	1	1	1	1		Construction worker	Male	26-35
Maputsoe F/C	Leribe	Urban	Self-reported as migrant	Lesotho	Lesotho	1		Three to four months refills	1									No									Other occupation	Female	36-45
Maputsoe F/C	Leribe	Urban	Self-reported as migrant	Lesotho	Lesotho	1		Five to six months refills									1	No
Maputsoe F/C	Leribe	Urban	Self-reported as migrant	Lesotho	Lesotho	1		Five to six months refills	1	1	1	1	1				1	Yes		1	1	1					Healthcare professional	Male	36-45
Maputsoe F/C	Leribe	Urban	Self-reported as migrant	Lesotho	Lesotho	1		Three to four months refills									1	No									Domestic worker	Female	46-55
Maputsoe F/C	Leribe	Urban	Self-reported as migrant	Lesotho	Lesotho	1		Five to six months refills	1						1			No									Farmer	Female	26-35
Maputsoe F/C	Leribe	Urban	Self-reported as migrant	Lesotho	Lesotho	1			1									Yes							1		Domestic worker	Female	26-35
Maputsoe F/C	Leribe	Urban	Self-reported as migrant	Lesotho	Lesotho	1		Five to six months refills		1						1		No									Farmer	Female	26-35
Maputsoe F/C	Leribe	Urban	Self-reported as migrant	Lesotho	Lesotho	1		Three to four months refills		1					1			No									Domestic worker	Male	26-35
Maputsoe F/C	Leribe	Urban	Self-reported as migrant	Lesotho	Lesotho	1		Five to six months refills	1	1						1		No									Domestic worker	Female	26-35
Maputsoe F/C	Leribe	Urban	Self-reported as migrant	Lesotho	Lesotho	1		Three to four months refills	1							1		Yes	1						1		Textile industry worker	Female	36-45
Maputsoe F/C	Leribe	Urban	Self-reported as migrant	Lesotho				Five to six months refills									1	No	1						1		Student	Female	26-35
Maputsoe F/C	Leribe	Urban	Self-reported as migrant	Lesotho	Lesotho	1		Three to four months refills	1	1								No									Textile industry worker	Female	36-45
Maputsoe F/C	Leribe	Urban	Self-reported as migrant	Lesotho	Lesotho	1		Three to four months refills							1	1		No									Construction worker	Female	36-45
Maputsoe F/C	Leribe	Urban	Self-reported as migrant	South Africa	Lesotho	1		Three to four months refills		1						1		No									Miner	Male	26-35
Maputsoe F/C	Leribe	Urban	Self-reported as migrant	Lesotho	Lesotho	1		Three to four months refills	1							1		Yes	1								Domestic worker	Female	26-35
Maputsoe F/C	Leribe	Urban	Self-reported as migrant	Lesotho	Lesotho	1		Three to four months refills	1						1			No									Construction worker	Male	36-45
Maputsoe F/C	Leribe	Urban	Self-reported as migrant	Lesotho	Lesotho	1		Five to six months refills										Yes		1							Textile industry worker	Female	36-45
Maputsoe F/C	Leribe	Urban	Self-reported as migrant	Lesotho	Lesotho	1		Five to six months refills								1		No							1		Farmer	Female	36-45
Maputsoe F/C	Leribe	Urban	Self-reported as migrant	South Africa	South Africa		1	Five to six months refills				1						No									Domestic worker	Female	18-25
Maputsoe F/C	Leribe	Urban	Self-reported as migrant	Lesotho	Lesotho	1		Five to six months refills								1		Yes	1									Male	46-55
Maputsoe F/C	Leribe	Urban	Self-reported as migrant	Lesotho	Lesotho	1		Five to six months refills	1									Yes					1				Domestic worker	Female	36-45
Maputsoe F/C	Leribe	Urban	Self-reported as migrant	Lesotho	Lesotho	1		Three to four months refills	1									No									Construction worker	Male	26-35
Maputsoe F/C	Leribe	Urban	Self-reported as migrant	Lesotho	Lesotho	1		Five to six months refills									1	No										Female	26-35
Maputsoe F/C	Leribe	Urban	Self-reported as migrant	Lesotho	Lesotho	1		Five to six months refills								1		No									Farmer	Female	Over 55
Maputsoe F/C	Leribe	Urban	Self-reported as migrant	Lesotho	Lesotho	1		Five to six months refills							1			No									Domestic worker	Female	46-55
Maputsoe F/C	Leribe	Urban	Self-reported as migrant	Lesotho	Lesotho	1		Three to four months refills									1	No									Textile industry worker	Female	46-55
Maputsoe F/C	Leribe	Urban	Self-reported as migrant	Lesotho	Lesotho	1		Five to six months refills								1		No							1		Textile industry worker	Female	36-45
Maputsoe F/C	Leribe	Urban	Self-reported as migrant	Lesotho	Lesotho	1		Five to six months refills		1			1		1	1		No									Construction worker	Male	36-45
Maputsoe F/C	Leribe	Urban	Self-reported as migrant	Lesotho	Lesotho	1		Five to six months refills								1		No									Farmer	Female	36-45
Maputsoe F/C	Leribe	Urban	Self-reported as migrant	Lesotho	Lesotho	1		Five to six months refills																			Farmer	Female	18-25
Maputsoe F/C	Leribe	Urban	Self-reported as migrant	Lesotho	Lesotho	1		Three to four months refills	1									No									Construction worker	Male	26-35
Maputsoe F/C	Leribe	Urban	Self-reported as migrant	Lesotho	Lesotho	1											1	No									Construction worker	Male	36-45
Maputsoe F/C	Leribe	Urban	Self-reported as migrant	Lesotho	Lesotho	1		Five to six months refills								1		No									Textile industry worker	Female	46-55
Maputsoe F/C	Leribe	Urban	Self-reported as migrant	Lesotho	Lesotho	1		Five to six months refills								1		No									Textile industry worker	Female	26-35
Maputsoe F/C	Leribe	Urban	Self-reported as migrant	Lesotho	Lesotho	1		Five to six months refills	1	1	1	1	1	1	1	1		No									Textile industry worker	Female	Over 55
Maputsoe F/C	Leribe	Urban	Self-reported as migrant	Lesotho	Lesotho	1		Five to six months refills	1							1		No									Textile industry worker	Female	26-35
Maputsoe F/C	Leribe	Urban	Self-reported as migrant	Lesotho	Lesotho	1		Five to six months refills	1									No									Construction worker	Male	26-35
Maputsoe F/C	Leribe	Urban	Self-reported as migrant	Lesotho	Lesotho	1		Five to six months refills						1				No									Textile industry worker	Male	26-35
Maputsoe F/C	Leribe	Urban	Self-reported as migrant	Lesotho	Lesotho	1		Three to four months refills									1	No									Domestic worker	Female	26-35
Maputsoe F/C	Leribe	Urban	Self-reported as migrant	Lesotho	Lesotho	1		Five to six months refills	1							1		No									Domestic worker	Female	Over 55
Maputsoe F/C	Leribe	Urban	Self-reported as migrant	Lesotho	Lesotho	1		Five to six months refills									1	No									Student	Male	26-35
Maputsoe F/C	Leribe	Urban	Self-reported as migrant	Lesotho	Lesotho	1		Five to six months refills	1									No									Textile industry worker	Female	46-55
Maputsoe F/C	Leribe	Urban	Self-reported as migrant	Lesotho	Lesotho	1		Five to six months refills	1				1					No											26-35
Maputsoe F/C	Leribe	Urban	Self-reported as migrant	Lesotho	Lesotho	1		Three to four months refills				1			1			No									Farmer	Female	26-35
Maputsoe F/C	Leribe	Urban	Self-reported as migrant	Lesotho	Lesotho	1		Five to six months refills	1						1			No									Domestic worker	Female	36-45
Maputsoe F/C	Leribe	Urban	Self-reported as migrant	Lesotho	Lesotho	1			1			1				1		No									Domestic worker	Female	46-55
Maputsoe F/C	Leribe	Urban	Self-reported as migrant	Lesotho	Lesotho	1		Five to six months refills	1									No									Domestic worker		46-55
Maputsoe F/C	Leribe	Urban	Self-reported as migrant	Lesotho	Lesotho	1		Five to six months refills									1	No									Other occupation	Female	18-25
Maputsoe F/C	Leribe	Urban	Self-reported as migrant	Lesotho	Lesotho	1		Three to four months refills	1									No									Construction worker	Male	36-45
Maputsoe F/C	Leribe	Urban	Self-reported as migrant	Lesotho	Lesotho	1		Five to six months refills									1	No									Textile industry worker	Male	26-35
Maputsoe F/C	Leribe	Urban	Self-reported as migrant	Lesotho	Lesotho	1		Three to four months refills				1						No				1					Domestic worker	Female	26-35
Maputsoe F/C	Leribe	Urban	Self-reported as migrant	Lesotho	Lesotho	1		One to two months refills									1	No									Domestic worker	Female	26-35
Maputsoe F/C	Leribe	Urban	Self-reported as migrant	Lesotho	Lesotho	1		Five to six months refills		1		1		1			1	Yes		1					1		Textile industry worker	Male	26-35
Maputsoe F/C	Leribe	Urban	Self-reported as migrant	Lesotho	Lesotho	1		Five to six months refills	1	1				1	1			Yes	1	1					1		Domestic worker	Female	36-45
Maputsoe F/C	Leribe	Urban	Self-reported as migrant	South Africa	Lesotho	1		Five to six months refills				1				1		Yes						1	1		Textile industry worker	Female	26-35
Maputsoe F/C	Leribe	Urban	Self-reported as migrant	Lesotho	Lesotho	1		Five to six months refills		1								No						1			Miner	Male	36-45
Maputsoe F/C	Leribe	Urban	Self-reported as migrant	Lesotho	Lesotho	1		Five to six months refills										No							1		Farmer	Male	Over 55
Maputsoe F/C	Leribe	Urban	Self-reported as migrant	South Africa	Lesotho	1		Three to four months refills	1						1	1		Yes	1								Construction worker	Male	26-35
Maputsoe F/C	Leribe	Urban	Self-reported as migrant	South Africa	Lesotho	1		Three to four months refills	1	1					1	1		Yes	1						1		Domestic worker	Female	36-45
Maputsoe F/C	Leribe	Urban	Self-reported as migrant	Lesotho	Lesotho	1		One to two months refills	1	1	1				1	1		No									Construction worker	Male	36-45
Maputsoe F/C	Leribe	Urban	Self-reported as migrant	Lesotho	Lesotho	1		One to two months refills									1	No									Textile industry worker	Female	36-45
Maputsoe F/C	Leribe	Urban	Self-reported as migrant	Lesotho	Lesotho	1		Five to six months refills									1	Yes								1	Other occupation	Female	26-35
Maputsoe F/C	Leribe	Urban	Self-reported as migrant	Lesotho	Lesotho	1		One to two months refills									1	Yes	1								Construction worker	Male	36-45
Maputsoe F/C	Leribe	Urban	Self-reported as migrant	Lesotho	Lesotho	1		Three to four months refills	1									No	1								Construction worker	Male	26-35
Maputsoe F/C	Leribe	Urban	Self-reported as migrant	Lesotho	Lesotho	1		Five to six months refills									1	No									Construction worker	Male	36-45
Maputsoe F/C	Leribe	Urban	Self-reported as migrant	Lesotho	Lesotho	1		Five to six months refills									1	No									Construction worker	Female	36-45
Maputsoe F/C	Leribe	Urban	Self-reported as migrant	South Africa	Lesotho	1		Five to six months refills									1	No									Domestic worker	Female	26-35
Maputsoe F/C	Leribe	Urban	Self-reported as migrant	Lesotho	Lesotho	1		Five to six months refills	1									No									Domestic worker	Female	36-45
Maputsoe F/C	Leribe	Urban	Self-reported as migrant	Lesotho	Lesotho	1		One to two months refills									1	Yes	1								Farmer		18-25
Matelile H/C	Mafeteng	Rural	Self-reported as migrant	Lesotho	Lesotho	1		Five to six months refills		1					1			No									Other occupation	Male	26-35
Matelile H/C	Mafeteng	Rural	Self-reported as migrant	Lesotho				Three to four months refills	1									No									Construction worker	Male	36-45
Matelile H/C	Mafeteng	Rural	Self-reported as migrant	Lesotho	Lesotho	1		Five to six months refills									1	No									Miner	Male	36-45
Matelile H/C	Mafeteng	Rural	Self-reported as migrant	Lesotho	Lesotho	1		Five to six months refills	1									No									Domestic worker	Female	26-35
Matelile H/C	Mafeteng	Rural	Self-reported as migrant	Lesotho	Lesotho	1		One to two months refills	1						1			Yes							1		Domestic worker	Female	36-45
Matelile H/C	Mafeteng	Rural	Self-reported as migrant	Lesotho	Lesotho	1		Five to six months refills						1				Yes							1		Construction worker	Male	26-35
Matelile H/C	Mafeteng	Rural	Self-reported as migrant	Lesotho	Lesotho	1		Five to six months refills	1							1		No									Domestic worker	Female	26-35
Matelile H/C	Mafeteng	Rural	Self-reported as migrant	Lesotho	Lesotho	1		Three to four months refills					1					No									Domestic worker	Female	36-45
Matelile H/C	Mafeteng	Rural	Self-reported as migrant	Lesotho	Lesotho	1		Five to six months refills							1	1		Yes	1								Construction worker	Male	26-35
Matelile H/C	Mafeteng	Rural	Self-reported as migrant	Lesotho	Lesotho	1		Five to six months refills				1			1	1		Yes	1								Domestic worker	Female	46-55
Matlameng H/C	Leribe	Rural	Self-reported as migrant	Lesotho	Lesotho	1		Five to six months refills		1		1	1	1	1	1		No									Domestic worker	Female	36-45
Matlameng H/C	Leribe	Rural	Self-reported as migrant	Lesotho	Lesotho	1		Five to six months refills	1						1	1		No									Domestic worker	Female	26-35
Matlameng H/C	Leribe	Rural	Self-reported as migrant	Lesotho	Lesotho	1		Five to six months refills	1	1			1	1	1	1		Yes	1	1			1	1	1		Farmer	Female	36-45
Matlameng H/C	Leribe	Rural	Self-reported as migrant	Lesotho	Lesotho	1		Three to four months refills									1	No									Domestic worker	Female	46-55
Matlameng H/C	Leribe	Rural	Self-reported as migrant	Lesotho	Lesotho	1		Five to six months refills	1	1	1	1			1	1		No									Construction worker	Male	36-45
Matlameng H/C	Leribe	Rural	Self-reported as migrant	Lesotho	Lesotho	1		One to two months refills								1		Yes								1	Miner	Male	46-55
Matlameng H/C	Leribe	Rural	Self-reported as migrant	Lesotho	Lesotho	1		Three to four months refills	1	1						1		No									Domestic worker	Female	26-35
Nazareth H/C	Maseru	Rural	Self-reported as migrant	Lesotho	Lesotho	1		Five to six months refills								1		No									Domestic worker	Female	36-45
Nazareth H/C	Maseru	Rural	Self-reported as migrant	South Africa	Lesotho	1		Five to six months refills								1		No									Domestic worker	Female	26-35
Nazareth H/C	Maseru	Rural	Self-reported as migrant	South Africa	South Africa		1	Three to four months refills									1	No									Domestic worker	Female	46-55
Nazareth H/C	Maseru	Rural	Self-reported as migrant	Lesotho	Lesotho	1		One to two months refills									1	No									Domestic worker	Female	36-45
Nazareth H/C	Maseru	Rural	Self-reported as migrant	Lesotho	Lesotho	1		Five to six months refills								1		No									Other occupation	Male	36-45
Nazareth H/C	Maseru	Rural	Self-reported as migrant	Lesotho	Lesotho	1		Three to four months refills									1	No									Domestic worker	Female	36-45
Nazareth H/C	Maseru	Rural	Self-reported as migrant	Lesotho	Lesotho	1		Three to four months refills									1	No									Domestic worker	Female	36-45
Nazareth H/C	Maseru	Rural	Self-reported as migrant	Lesotho	Lesotho	1		Three to four months refills										No											36-45
Nazareth H/C	Maseru	Rural	Self-reported as migrant	Lesotho	Lesotho	1		Three to four months refills										No
Nazareth H/C	Maseru	Rural	Self-reported as migrant	Lesotho	Lesotho	1		Five to six months refills										No											46-55
Nazareth H/C	Maseru	Rural	Self-reported as migrant	Lesotho														No
Nazareth H/C	Maseru	Rural	Self-reported as migrant	Lesotho	Lesotho	1		One to two months refills								1		No									Other occupation		26-35
Nazareth H/C	Maseru	Rural	Self-reported as migrant	Lesotho	Lesotho	1		One to two months refills	1									No									Construction worker	Female	26-35
Nazareth H/C	Maseru	Rural	Self-reported as migrant	Lesotho	Lesotho	1		Three to four months refills									1	No										Female	36-45
Nazareth H/C	Maseru	Rural	Self-reported as migrant	Lesotho	Lesotho	1		Three to four months refills									1	No									Farmer	Male	46-55
Nazareth H/C	Maseru	Rural	Self-reported as migrant	Lesotho	Lesotho	1		Five to six months refills									1	No									Domestic worker	Female	18-25
Nazareth H/C	Maseru	Rural	Self-reported as migrant	Lesotho	Lesotho	1		Three to four months refills									1	No									Textile industry worker	Female	18-25
Nazareth H/C	Maseru	Rural	Self-reported as migrant	Lesotho	Lesotho	1		Three to four months refills									1	No									Domestic worker	Female	18-25
Nazareth H/C	Maseru	Rural	Self-reported as migrant	Lesotho	Lesotho	1		Three to four months refills									1	No									Construction worker	Male	36-45
Nazareth H/C	Maseru	Rural	Self-reported as migrant	Lesotho	Lesotho	1		Five to six months refills									1	No									Domestic worker	Female	36-45
Nazareth H/C	Maseru	Rural	Self-reported as migrant	Lesotho	South Africa		1	Three to four months refills									1	No									Other occupation	Male	36-45
Nazareth H/C	Maseru	Rural	Self-reported as migrant	Lesotho	South Africa		1	Three to four months refills								1		Yes	1								Domestic worker	Female	26-35
Nazareth H/C	Maseru	Rural	Self-reported as migrant	Lesotho	Lesotho	1		Three to four months refills									1	No									Construction worker	Male	26-35
Nazareth H/C	Maseru	Rural	Self-reported as migrant	Lesotho	Lesotho	1		Three to four months refills					1					Yes								1	Textile industry worker	Female	26-35
Nazareth H/C	Maseru	Rural	Self-reported as migrant	Lesotho	Lesotho	1		One to two months refills								1		No									Domestic worker	Female	Over 55
Nazareth H/C	Maseru	Rural	Self-reported as migrant	Lesotho	Lesotho	1		Three to four months refills									1	No									Domestic worker		46-55
Paki H/C	Maseru	Rural	Self-reported as migrant	Lesotho	Lesotho	1		Five to six months refills								1		No									Domestic worker	Female	46-55
Paki H/C	Maseru	Rural	Self-reported as migrant	Lesotho	Lesotho	1		Five to six months refills								1		No									Domestic worker	Female	36-45
Paki H/C	Maseru	Rural	Self-reported as migrant	Lesotho	Lesotho	1		Five to six months refills								1		No									Textile industry worker	Female	36-45
Paki H/C	Maseru	Rural	Self-reported as migrant	Lesotho	Lesotho	1		Five to six months refills								1		No									Domestic worker	Female	18-25
Paki H/C	Maseru	Rural	Self-reported as migrant	Lesotho	Lesotho	1		Three to four months refills	1									No									Miner	Male	46-55
Paki H/C	Maseru	Rural	Self-reported as migrant	Lesotho	Lesotho	1		Three to four months refills		1			1	1				No									Domestic worker	Female	36-45
Paki H/C	Maseru	Rural	Self-reported as migrant	Lesotho	Lesotho	1		Five to six months refills								1		Yes							1		Domestic worker	Female	36-45
Paki H/C	Maseru	Rural	Self-reported as migrant	Lesotho	Lesotho	1			1					1		1		No									Construction worker	Male	26-35
Paki H/C	Maseru	Rural	Self-reported as migrant	Lesotho	Lesotho	1		Five to six months refills										No									Domestic worker	Female	36-45
Paki H/C	Maseru	Rural	Self-reported as migrant	Lesotho	Lesotho	1		Five to six months refills								1		Yes							1		Domestic worker	Female	26-35
Paki H/C	Maseru	Rural	Self-reported as migrant	Lesotho	Lesotho	1		Five to six months refills								1		Yes							1		Domestic worker	Female	36-45
Paki H/C	Maseru	Rural	Self-reported as migrant	Lesotho	Lesotho	1		Five to six months refills								1		Yes							1		Domestic worker	Female	26-35
Paki H/C	Maseru	Rural	Self-reported as migrant	Lesotho	Lesotho	1		Five to six months refills								1		Yes							1		Domestic worker	Female	46-55
Paki H/C	Maseru	Rural	Self-reported as migrant	Lesotho	Lesotho	1		Five to six months refills								1		Yes							1		Domestic worker	Female	46-55
Paki H/C	Maseru	Rural	Self-reported as migrant	Lesotho	Lesotho	1		Five to six months refills										No									Domestic worker	Female	46-55
Paki H/C	Maseru	Rural	Self-reported as migrant	Lesotho	Lesotho	1		Five to six months refills										No									Domestic worker	Female	36-45
Paki H/C	Maseru	Rural	Self-reported as migrant	Lesotho	Lesotho	1		Five to six months refills								1		Yes							1		Student	Female	36-45
Paki H/C	Maseru	Rural	Self-reported as migrant	Lesotho	Lesotho	1		Five to six months refills				1			1	1		Yes	1	1	1	1	1	1	1	1	Domestic worker	Female	26-35
Paki H/C	Maseru	Rural	Self-reported as migrant	Lesotho	Lesotho	1		Five to six months refills				1			1	1		No									Domestic worker	Female	36-45
Paki H/C	Maseru	Rural	Self-reported as migrant		Lesotho	1		Five to six months refills				1		1	1	1		Yes	1	1	1	1	1	1	1	1	Domestic worker	Female	26-35
Paki H/C	Maseru	Rural	Self-reported as migrant	Lesotho	Lesotho	1		Five to six months refills	1									Yes	1								Construction worker	Male	36-45
Paki H/C	Maseru	Rural	Self-reported as migrant	Lesotho	Lesotho	1		Five to six months refills								1		Yes							1		Domestic worker	Female	26-35
Paki H/C	Maseru	Rural	Self-reported as migrant	Lesotho	Lesotho	1		Five to six months refills								1		Yes							1		Domestic worker	Female	36-45
Paki H/C	Maseru	Rural	Self-reported as migrant	Lesotho	Lesotho	1		Five to six months refills								1		Yes							1		Domestic worker	Female	36-45
Paki H/C	Maseru	Rural	Self-reported as migrant	South Africa	Lesotho	1		Five to six months refills		1								No									Domestic worker		36-45
Paki H/C	Maseru	Rural	Self-reported as migrant	Lesotho	Lesotho	1		Five to six months refills	1	1	1	1	1	1	1	1		Yes	1	1	1	1	1	1	1		Domestic worker	Female	36-45
Paki H/C	Maseru	Rural	Self-reported as migrant	Lesotho	Lesotho	1		Five to six months refills	1	1	1	1	1	1	1	1		Yes	1	1	1	1	1	1	1		Domestic worker	Female	36-45
Paki H/C	Maseru	Rural	Self-reported as migrant	Lesotho	Lesotho	1		One to two months refills										No
Paki H/C	Maseru	Rural	Self-reported as migrant															No
Paki H/C	Maseru	Rural	Self-reported as migrant	Lesotho	Lesotho	1		Five to six months refills	1	1	1							No									Domestic worker	Female	26-35
Paki H/C	Maseru	Rural	Self-reported as migrant	Lesotho	Lesotho	1		Five to six months refills									1	Yes							1		Domestic worker	Female	26-35
Paki H/C	Maseru	Rural	Self-reported as migrant	Lesotho	Lesotho	1		Five to six months refills	1	1	1	1			1	1		No									Domestic worker	Female	36-45
Paki H/C	Maseru	Rural	Self-reported as migrant	Lesotho	Lesotho	1		Five to six months refills	1	1				1	1						1			1	1		Domestic worker	Female	36-45
Paki H/C	Maseru	Rural	Self-reported as migrant	Lesotho	Lesotho	1		Five to six months refills	1	1				1	1			No									Domestic worker	Female	36-45
Paki H/C	Maseru	Rural	Self-reported as migrant	Lesotho	Lesotho	1		Five to six months refills	1						1			No									Domestic worker	Female	26-35
Paki H/C	Maseru	Rural	Self-reported as migrant	Lesotho	Lesotho	1		Three to four months refills	1	1						1		No									Domestic worker	Female	46-55
Paki H/C	Maseru	Rural	Self-reported as migrant	Lesotho	Lesotho	1		Three to four months refills							1			No									Textile industry worker	Female	36-45
Paki H/C	Maseru	Rural	Self-reported as migrant	Lesotho	Lesotho	1		Three to four months refills		1																	Construction worker	Male	36-45
Paki H/C	Maseru	Rural	Self-reported as migrant	Lesotho	Lesotho	1		Three to four months refills								1		No									Domestic worker	Female	26-35
Paki H/C	Maseru	Rural	Self-reported as migrant	Lesotho	Lesotho	1		Three to four months refills		1	1							No									Domestic worker	Female	46-55
Paki H/C	Maseru	Rural	Self-reported as migrant	Lesotho	Lesotho	1		Three to four months refills								1		No									Domestic worker	Female	46-55
Paki H/C	Maseru	Rural	Self-reported as migrant	Lesotho	Lesotho	1		Three to four months refills		1																	Domestic worker	Female	46-55
Paki H/C	Maseru	Rural	Self-reported as migrant	Lesotho	Lesotho	1		One to two months refills										No
Paki H/C	Maseru	Rural	Self-reported as migrant	Lesotho	Lesotho	1		Three to four months refills						1				No									Textile industry worker	Female	26-35
Paki H/C	Maseru	Rural	Self-reported as migrant	Lesotho	Lesotho	1		One to two months refills									1	No									Domestic worker	Female	18-25
Paki H/C	Maseru	Rural	Self-reported as migrant	Lesotho	Lesotho	1		Three to four months refills									1	No									Domestic worker	Female	26-35
Paki H/C	Maseru	Rural	Self-reported as migrant	Lesotho	Lesotho	1		Three to four months refills	1					1	1	1		No									Domestic worker	Female	36-45
Paki H/C	Maseru	Rural	Self-reported as migrant	Lesotho	Lesotho	1		Five to six months refills								1		No									Domestic worker	Female	36-45
Paki H/C	Maseru	Rural	Self-reported as migrant	Lesotho	Lesotho	1		Five to six months refills					1					No									Student	Male
Paki H/C	Maseru	Rural	Self-reported as migrant	Lesotho	Lesotho	1		Five to six months refills										No									Domestic worker	Female	36-45
Paki H/C	Maseru	Rural	Self-reported as migrant	Lesotho	Lesotho	1		Five to six months refills								1		No									Domestic worker	Female	36-45
Paki H/C	Maseru	Rural	Self-reported as migrant	Lesotho	Lesotho	1		Three to four months refills	1		1					1		No									Domestic worker	Female	26-35
Pontmain H/C	Leribe	Rural	Self-reported as migrant	Lesotho	Lesotho	1		Five to six months refills									1	No									Domestic worker	Female	18-25
Pontmain H/C	Leribe	Rural	Self-reported as migrant	Lesotho	Lesotho	1		Five to six months refills									1	No									Domestic worker	Female	18-25
Pontmain H/C	Leribe	Rural	Self-reported as migrant	Lesotho	Lesotho	1		Five to six months refills									1	No									Domestic worker	Female	18-25
Pontmain H/C	Leribe	Rural	Self-reported as migrant	Lesotho	Lesotho	1		Five to six months refills									1	No									Textile industry worker	Male	26-35
Pontmain H/C	Leribe	Rural	Self-reported as migrant	Lesotho	Lesotho	1		Five to six months refills									1	No									Miner	Male	36-45
Pontmain H/C	Leribe	Rural	Self-reported as migrant	Lesotho	Lesotho	1		Five to six months refills									1	No									Miner	Male	36-45
Pontmain H/C	Leribe	Rural	Self-reported as migrant	Lesotho	Lesotho	1												No									Miner	Male	46-55
Pontmain H/C	Leribe	Rural	Self-reported as migrant	Lesotho	Lesotho	1		Five to six months refills									1	No									Domestic worker	Female	26-35
Pontmain H/C	Leribe	Rural	Self-reported as migrant	Lesotho	Lesotho	1		Five to six months refills									1	No									Miner	Male	26-35
Pontmain H/C	Leribe	Rural	Self-reported as migrant	Lesotho	Lesotho	1		Five to six months refills									1	No									Miner	Male	26-35
Pontmain H/C	Leribe	Rural	Self-reported as migrant	Lesotho				Five to six months refills							1	1		No									Domestic worker	Female	46-55
Pontmain H/C	Leribe	Rural	Self-reported as migrant	Lesotho	Lesotho	1		Five to six months refills	1	1		1		1	1	1		No									Other occupation	Female	46-55
Pontmain H/C	Leribe	Rural	Self-reported as migrant	Lesotho	Lesotho	1		Five to six months refills									1	No								1	Domestic worker	Female	26-35
Pontmain H/C	Leribe	Rural	Self-reported as migrant	Lesotho	Lesotho	1		Five to six months refills								1		No									Domestic worker	Female	26-35
Pontmain H/C	Leribe	Rural	Self-reported as migrant	Lesotho	Lesotho	1		Five to six months refills		1				1				No									Farmer	Female	26-35
Pontmain H/C	Leribe	Rural	Self-reported as migrant	Lesotho	Lesotho	1		Five to six months refills	1									No									Domestic worker	Female	36-45
Pontmain H/C	Leribe	Rural	Self-reported as migrant	Lesotho	Lesotho	1		Five to six months refills		1						1		No									Domestic worker	Female	36-45
Pontmain H/C	Leribe	Rural	Self-reported as migrant	Lesotho	Lesotho	1		Five to six months refills									1	No									Domestic worker	Female	36-45
Pontmain H/C	Leribe	Rural	Self-reported as migrant	South Africa	South Africa		1	Five to six months refills									1	No									Miner	Male	26-35
Pontmain H/C	Leribe	Rural	Self-reported as migrant	South Africa				Five to six months refills									1	No									Miner	Male	36-45
Pontmain H/C	Leribe	Rural	Self-reported as migrant	South Africa	South Africa		1	Five to six months refills									1	No									Domestic worker	Female	26-35
Pontmain H/C	Leribe	Rural	Self-reported as migrant	South Africa				Five to six months refills						1				No									Domestic worker	Female	36-45
Pontmain H/C	Leribe	Rural	Self-reported as migrant	South Africa	Lesotho	1		Five to six months refills									1	No									Other occupation	Female	26-35
Pontmain H/C	Leribe	Rural	Self-reported as migrant	Lesotho	Lesotho	1		Five to six months refills									1	No											46-55
Pontmain H/C	Leribe	Rural	Self-reported as migrant	Lesotho	Lesotho	1		Five to six months refills									1	No									Other occupation	Male	26-35
Pontmain H/C	Leribe	Rural	Self-reported as migrant	South Africa														No									Domestic worker	Male	36-45
Pontmain H/C	Leribe	Rural	Self-reported as migrant	South Africa	South Africa		1	Five to six months refills									1	No									Construction worker
Pontmain H/C	Leribe	Rural	Self-reported as migrant	South Africa	Lesotho	1												No									Miner	Male	46-55
Pontmain H/C	Leribe	Rural	Self-reported as migrant	Lesotho	Lesotho	1		Five to six months refills				1						No									Domestic worker	Female	36-45
Pontmain H/C	Leribe	Rural	Self-reported as migrant	Lesotho	Lesotho	1		Five to six months refills	1									Yes	1	1					1		Construction worker	Male	36-45
Pontmain H/C	Leribe	Rural	Self-reported as migrant	Lesotho				Five to six months refills	1							1		Yes	1	1					1		Domestic worker	Female	46-55
Pontmain H/C	Leribe	Rural	Self-reported as migrant	Lesotho				Five to six months refills	1									No									Domestic worker	Female	36-45
Pontmain H/C	Leribe	Rural	Self-reported as migrant	Lesotho	Lesotho	1		Five to six months refills							1			No									Farmer	Female	26-35
Pontmain H/C	Leribe	Rural	Self-reported as migrant	Lesotho	South Africa		1	Five to six months refills									1	No									Textile industry worker	Male	46-55
Pontmain H/C	Leribe	Rural	Self-reported as migrant	Lesotho	Lesotho	1		Five to six months refills									1	No									Domestic worker	Female	26-35
Pontmain H/C	Leribe	Rural	Self-reported as migrant	Lesotho	Lesotho	1		Five to six months refills									1	No									Domestic worker	Female	36-45
Pontmain H/C	Leribe	Rural	Self-reported as migrant	Lesotho	Lesotho	1		Five to six months refills									1	No									Domestic worker	Female	46-55
Pontmain H/C	Leribe	Rural	Self-reported as migrant	Lesotho	Lesotho	1		Five to six months refills									1	No									Miner	Male	26-35
Pontmain H/C	Leribe	Rural	Self-reported as migrant	Lesotho	Lesotho	1		Three to four months refills								1		Yes	1								Domestic worker	Female	36-45
Pontmain H/C	Leribe	Rural	Self-reported as migrant	Lesotho	Lesotho	1		Three to four months refills								1		Yes	1								Domestic worker	Female	26-35
Pontmain H/C	Leribe	Rural	Self-reported as migrant	Lesotho	Lesotho	1		Five to six months refills								1		No									Other occupation	Female	36-45
Pontmain H/C	Leribe	Rural	Self-reported as migrant	Lesotho	Lesotho	1		Five to six months refills									1	No									Domestic worker	Female	26-35
Pontmain H/C	Leribe	Rural	Self-reported as migrant	Lesotho	Lesotho	1		Five to six months refills									1	No									Construction worker	Male	18-25
Pontmain H/C	Leribe	Rural	Self-reported as migrant	Lesotho	Lesotho	1		Five to six months refills						1				No									Domestic worker	Female	18-25
Pontmain H/C	Leribe	Rural	Self-reported as migrant	Lesotho	Lesotho	1		Five to six months refills								1		No									Farmer	Male	26-35
Pontmain H/C	Leribe	Rural	Self-reported as migrant	Lesotho	Lesotho	1		Five to six months refills									1	No									Construction worker	Female	18-25
Pontmain H/C	Leribe	Rural	Self-reported as migrant	Lesotho	Lesotho	1		Five to six months refills									1	No									Domestic worker	Female	18-25
Pontmain H/C	Leribe	Rural	Self-reported as migrant	Lesotho	Lesotho	1		Five to six months refills									1	No									Domestic worker	Female	18-25
Pontmain H/C	Leribe	Rural	Self-reported as migrant	Lesotho	Lesotho	1		Five to six months refills									1	No									Domestic worker
Pontmain H/C	Leribe	Rural	Self-reported as migrant	Lesotho	Lesotho	1		Five to six months refills									1	No									Domestic worker		18-25
Thamae H/C	Maseru	Urban	Self-reported as migrant	Lesotho	Lesotho	1		Five to six months refills									1	No									Other occupation	Female	26-35
Thamae H/C	Maseru	Urban	Self-reported as migrant	Lesotho	Lesotho	1		Five to six months refills									1	Yes							1
Thamae H/C	Maseru	Urban	Self-reported as migrant	Lesotho	Lesotho	1		Five to six months refills	1	1								No									Domestic worker	Female	36-45
Thamae H/C	Maseru	Urban	Self-reported as migrant	Lesotho	Lesotho	1		Three to four months refills									1	No									Other occupation	Female	36-45
Thamae H/C	Maseru	Urban	Self-reported as migrant	South Africa	South Africa		1	Five to six months refills		1			1					No									Other occupation	Male	26-35
Thamae H/C	Maseru	Urban	Self-reported as migrant	Lesotho	Lesotho	1		Five to six months refills	1				1		1	1		No									Domestic worker	Female	26-35
Thamae H/C	Maseru	Urban	Self-reported as migrant	South Africa	Lesotho	1		One to two months refills									1	Yes							1		Domestic worker	Female	36-45
Thamae H/C	Maseru	Urban	Self-reported as migrant	Lesotho	South Africa		1	Five to six months refills	1				1	1	1	1		No									Domestic worker	Female	46-55
Thamae H/C	Maseru	Urban	Self-reported as migrant	Lesotho	Lesotho	1		One to two months refills	1									Yes	1							1	Construction worker	Female	36-45
Thamae H/C	Maseru	Urban	Self-reported as migrant	Lesotho	Lesotho	1		One to two months refills									1	Yes								1	Construction worker	Male	36-45
Thamae H/C	Maseru	Urban	Self-reported as migrant	Lesotho	Lesotho	1		Five to six months refills					1
Thamae H/C	Maseru	Urban	Self-reported as migrant	Lesotho	Lesotho	1		Three to four months refills		1								Yes	1								Textile industry worker	Female	46-55
Thamae H/C	Maseru	Urban	Self-reported as migrant	Lesotho	Lesotho	1		Five to six months refills	1		1			1	1	1		Yes	1	1	1		1	1	1		Other occupation	Female	18-25
Thamae H/C	Maseru	Urban	Self-reported as migrant	Lesotho	Lesotho	1		Five to six months refills	1		1			1	1	1		No									Domestic worker	Female	26-35
Thamae H/C	Maseru	Urban	Self-reported as migrant	Lesotho	Lesotho	1		Five to six months refills		1								Yes	1								Domestic worker	Female	36-45
Thamae H/C	Maseru	Urban	Self-reported as migrant	Lesotho	Lesotho	1		Five to six months refills		1								Yes	1								Domestic worker	Female	36-45
Thamae H/C	Maseru	Urban	Self-reported as migrant	Lesotho	Lesotho	1		Five to six months refills	1							1		No									Domestic worker	Female	26-35
Thamae H/C	Maseru	Urban	Self-reported as migrant	Lesotho	Lesotho	1		Five to six months refills	1		1		1	1	1	1		No										Female	36-45
Thamae H/C	Maseru	Urban	Self-reported as migrant	Lesotho	Lesotho	1		Five to six months refills								1		Yes	1	1					1		Other occupation	Female	Over 55
Thamae H/C	Maseru	Urban	Self-reported as migrant	Lesotho	Lesotho	1		Five to six months refills								1		No									Textile industry worker	Female	18-25
Thamae H/C	Maseru	Urban	Self-reported as migrant	Lesotho	Lesotho	1		Five to six months refills				1						Yes	1								Textile industry worker	Female	36-45
Thamae H/C	Maseru	Urban	Self-reported as migrant	Lesotho	Lesotho	1		Five to six months refills		1								Yes	1								Construction worker	Female	46-55
Thamae H/C	Maseru	Urban	Self-reported as migrant	Lesotho	Lesotho	1		Five to six months refills	1					1	1	1		No									Domestic worker	Female	26-35
Thamae H/C	Maseru	Urban	Self-reported as migrant	Lesotho	Lesotho	1		Five to six months refills	1	1					1	1		No									Textile industry worker	Female	36-45
Thamae H/C	Maseru	Urban	Self-reported as migrant	Lesotho	Lesotho	1		Five to six months refills	1									No									Domestic worker	Female	26-35
Thamae H/C	Maseru	Urban	Self-reported as migrant	Lesotho	Lesotho	1		One to two months refills									1	No									Other occupation	Female	18-25
Thamae H/C	Maseru	Urban	Self-reported as migrant	South Africa	Lesotho	1		Five to six months refills			1					1		Yes			1				1		Domestic worker	Female	36-45
Thamae H/C	Maseru	Urban	Self-reported as migrant	Lesotho	Lesotho	1		Five to six months refills									1	No									Domestic worker	Female	36-45
Thamae H/C	Maseru	Urban	Self-reported as migrant	Lesotho	South Africa		1	Five to six months refills		1						1		Yes	1	1		1			1		Domestic worker	Female	26-35
Thamae H/C	Maseru	Urban	Self-reported as migrant	Lesotho	Lesotho	1		Three to four months refills									1	No									Student	Male	36-45
Thamae H/C	Maseru	Urban	Self-reported as migrant	Lesotho	Lesotho	1		Five to six months refills									1	No									Domestic worker	Female	36-45
Thamae H/C	Maseru	Urban	Self-reported as migrant	Lesotho	Lesotho	1		Five to six months refills									1	No									Domestic worker	Female	26-35
Thamae H/C	Maseru	Urban	Self-reported as migrant	Lesotho	Lesotho	1		Five to six months refills	1							1		No									Domestic worker	Female	46-55
Thamae H/C	Maseru	Urban	Self-reported as migrant	South Africa	Lesotho	1		Five to six months refills									1	No									Domestic worker	Female	18-25
Thamae H/C	Maseru	Urban	Self-reported as migrant	Lesotho	Lesotho	1		Three to four months refills									1	No									Domestic worker		36-45
Thamae H/C	Maseru	Urban	Self-reported as migrant	Lesotho	Lesotho	1		Five to six months refills	1	1						1		No									Domestic worker	Female	36-45
Thamae H/C	Maseru	Urban	Self-reported as migrant	Lesotho	Lesotho	1		Five to six months refills									1	No									Farmer	Female	26-35
Thamae H/C	Maseru	Urban	Self-reported as migrant	South Africa	Lesotho	1		Three to four months refills				1					1	No									Other occupation	Female	18-25
Thamae H/C	Maseru	Urban	Self-reported as migrant	Lesotho	Lesotho	1		Five to six months refills		1						1		No									Textile industry worker	Male	36-45
Thamae H/C	Maseru	Urban	Self-reported as migrant	Lesotho	Lesotho	1		Three to four months refills									1	No									Other occupation	Female	26-35
Thamae H/C	Maseru	Urban	Self-reported as migrant	Lesotho	Lesotho	1		Three to four months refills									1	No									Other occupation	Male	36-45
Thamae H/C	Maseru	Urban	Self-reported as migrant		Lesotho	1		Three to four months refills									1	Yes		1							Other occupation	Female	26-35
Thamae H/C	Maseru	Urban	Self-reported as migrant	Lesotho	Lesotho	1		Five to six months refills							1			No									Domestic worker	Female	36-45
Thamae H/C	Maseru	Urban	Self-reported as migrant	Lesotho	Lesotho	1		Three to four months refills									1	No									Other occupation	Female	26-35
Thamae H/C	Maseru	Urban	Self-reported as migrant	Lesotho	Lesotho	1		Five to six months refills	1									No									Textile industry worker	Female	36-45
Thamae H/C	Maseru	Urban	Self-reported as migrant	Lesotho	Lesotho	1		Five to six months refills							1	1		No									Miner	Male	36-45
Thamae H/C	Maseru	Urban	Self-reported as migrant		Lesotho	1		Five to six months refills									1	Yes		1							Other occupation	Female	26-35
Thamae H/C	Maseru	Urban	Self-reported as migrant	South Africa	South Africa		1	Three to four months refills									1	No									Other occupation	Female	18-25
Tsakholo H/C	Mafeteng	Rural	Self-reported as migrant	Lesotho	Lesotho	1		Five to six months refills		1		1			1	1		Yes	1	1		1		1	1		Domestic worker	Female	36-45
Tsakholo H/C	Mafeteng	Rural	Self-reported as migrant	Lesotho	Lesotho	1		Five to six months refills									1	No									Domestic worker	Female	18-25
Tsakholo H/C	Mafeteng	Rural	Self-reported as migrant	Lesotho	Lesotho	1		Three to four months refills		1		1			1	1		No									Domestic worker	Female	Over 55
Tsakholo H/C	Mafeteng	Rural	Self-reported as migrant	Lesotho	Lesotho	1		Five to six months refills									1	No									Domestic worker	Female	26-35
Tsakholo H/C	Mafeteng	Rural	Self-reported as migrant	Lesotho	Lesotho	1		Five to six months refills									1	No									Construction worker	Male	26-35
Tsakholo H/C	Mafeteng	Rural	Self-reported as migrant	Lesotho	Lesotho	1		Three to four months refills									1	No									Other occupation	Male	36-45
Tsakholo H/C	Mafeteng	Rural	Self-reported as migrant	Lesotho	Lesotho	1		Three to four months refills		1								No									Construction worker	Male	36-45
Tsakholo H/C	Mafeteng	Rural	Self-reported as migrant	Lesotho	Lesotho	1		Three to four months refills	1						1	1		Yes		1				1	1		Textile industry worker	Female	18-25
Tsakholo H/C	Mafeteng	Rural	Self-reported as migrant	Lesotho	South Africa		1	Three to four months refills	1						1	1		Yes	1					1	1		Domestic worker	Female	36-45
Tsakholo H/C	Mafeteng	Rural	Self-reported as migrant	Lesotho	Lesotho	1		Five to six months refills									1	No									Domestic worker	Female	26-35
Tsakholo H/C	Mafeteng	Rural	Self-reported as migrant	Lesotho	Lesotho	1		One to two months refills	1	1	1	1	1	1	1	1		No									Domestic worker	Female	26-35
Tsakholo H/C	Mafeteng	Rural	Self-reported as migrant	Lesotho	Lesotho	1		Three to four months refills							1			No									Other occupation	Female	26-35
Tsakholo H/C	Mafeteng	Rural	Self-reported as migrant	Lesotho	Lesotho	1		Five to six months refills							1			Yes	1								Domestic worker	Female	26-35
Tsakholo H/C	Mafeteng	Rural	Self-reported as migrant	Lesotho	Lesotho	1		Five to six months refills							1			No									Domestic worker	Female	36-45
Tsakholo H/C	Mafeteng	Rural	Self-reported as migrant	Lesotho	Lesotho	1		Three to four months refills									1	No									Domestic worker	Female	36-45
Tsakholo H/C	Mafeteng	Rural	Self-reported as migrant	Lesotho	Lesotho	1		Five to six months refills									1	No									Other occupation	Male	36-45
Tsakholo H/C	Mafeteng	Rural	Self-reported as migrant	Lesotho	Lesotho	1		Five to six months refills							1	1		Yes	1					1	1		Construction worker	Male	36-45
Tsakholo H/C	Mafeteng	Rural	Self-reported as migrant	Lesotho	Lesotho	1		Three to four months refills							1	1		No									Domestic worker	Female	26-35
Tsakholo H/C	Mafeteng	Rural	Self-reported as migrant	Lesotho	Lesotho	1		One to two months refills	1	1					1	1		No									Other occupation	Female	46-55
Tsakholo H/C	Mafeteng	Rural	Self-reported as migrant	Lesotho	Lesotho	1		Five to six months refills									1	No									Domestic worker	Female	26-35
Tsakholo H/C	Mafeteng	Rural	Self-reported as migrant	Lesotho	South Africa		1	Three to four months refills								1		No									Construction worker	Male	26-35
Tsakholo H/C	Mafeteng	Rural	Self-reported as migrant	Lesotho	Lesotho	1		Three to four months refills									1	No									Other occupation	Female	Over 55
Tsakholo H/C	Mafeteng	Rural	Self-reported as migrant	Lesotho	Lesotho	1		One to two months refills						1				No									Domestic worker	Female	26-35
Tsakholo H/C	Mafeteng	Rural	Self-reported as migrant	Lesotho	Lesotho	1		Five to six months refills		1								No									Construction worker
